# Supplementary material
Source: publisher site journal article supplement (https://www.dovepress.com/article/378335)
Supplement: Supplementary file 1 [file get_supplementary_file.php]

**Supplementary Table 1** Sociodemographic and health-related characteristics of PWH obtained from PROs by study site (SMH vs MSCC)

| Variable                                | Category     | SMH (N=600)                        |                                                | MSCC (N=1032)                      |                                                |
|-----------------------------------------|--------------|------------------------------------|------------------------------------------------|------------------------------------|------------------------------------------------|
|                                         |              | Respondents, n<br>(%) <sup>a</sup> | PWH with characteristic, n<br>(%) <sup>b</sup> | Respondents, n<br>(%) <sup>a</sup> | PWH with characteristic, n<br>(%) <sup>b</sup> |
| ART adherence                           | ≥95%         | 534 (89)                           | 429 (80)                                       | 705 (68)                           | 542 (77)                                       |
|                                         | <95%         |                                    | 105 (20)                                       |                                    | 163 (23)                                       |
|                                         | ≥80%         |                                    | 501 (94)                                       |                                    | 632 (90)                                       |
|                                         | <80%         |                                    | 33 (6)                                         |                                    | 73 (10)                                        |
| HATQoL burden<br>item <sup>c</sup>      | Satisfied    | 555 (93)                           | 432 (78)                                       | 972 (94)                           | 823 (85)                                       |
|                                         | Dissatisfied |                                    | 123 (22)                                       |                                    | 149 (15)                                       |
| HATQoL normal life<br>item <sup>d</sup> | Satisfied    | 572 (95)                           | 475 (83)                                       | 983 (95)                           | 837 (85)                                       |
|                                         | Dissatisfied |                                    | 97 (17)                                        |                                    | 146 (15)                                       |
| Combined HATQoL<br>items                | Satisfied    | 583 (97)                           | 430 (74)                                       | 997 (97)                           | 796 (80)                                       |
|                                         | Dissatisfied |                                    | 153 (26)                                       |                                    | 201 (20)                                       |
|                                         | Yes          | 566 (94)                           | 368 (65)                                       | 973 (94)                           | 610 (63)                                       |

|                                  |                 |           |          |           |          |
|----------------------------------|-----------------|-----------|----------|-----------|----------|
| Difficulty meeting housing costs | No              |           | 198 (35) |           | 363 (37) |
| Depression                       | Moderate/Severe | 563 (94)  | 102 (18) | 970 (94)  | 196 (20) |
|                                  | Mild/None       |           | 461 (82) |           | 774 (80) |
| Intimate partner violence        | Yes             | 546 (91)  | 52 (10)  | 749 (73)  | 68 (9)   |
|                                  | No              |           | 494 (90) |           | 681 (91) |
| Risk of malnutrition             | Yes             | 591 (99)  | 112 (19) | 1017 (99) | 253 (25) |
|                                  | No              |           | 479 (81) |           | 764 (75) |
| Current smoker                   | Yes             | 598 (>99) | 116 (19) | 533 (52)  | 268 (50) |
|                                  | No              |           | 482 (81) |           | 265 (50) |
| Alcohol use                      | High risk       | 595 (99)  | 122 (21) | 1025 (99) | 189 (18) |
|                                  | Low risk        |           | 473 (79) |           | 836 (82) |
| Substance use (past 3 months)    | Yes             | 325 (54)  | 244 (75) | 663 (64)  | 371 (56) |
|                                  | No              |           | 81 (25)  |           | 292 (44) |

**Notes:** <sup>a</sup>Percentage of the total number of PWH included in the analysis at each site. <sup>b</sup>Percentage of respondents for each variable. <sup>c</sup>In the past 4 weeks, taking my [HIV] medicine has been a burden. <sup>d</sup>In the past 4 weeks, taking my [HIV] medicine has made it hard to live a normal life.

**Abbreviations:** ART, antiretroviral therapy; HATQoL, HIV/AIDS-targeted quality of life; MSCC, Midway Specialty Care Center; PRO, patient-reported outcomes assessment; PWH, people with HIV; SMH, St Michael's Hospital.

**Supplementary Table 2** Unadjusted odds ratios for association with <95% and <80% adherence to ART among PWH by study site (SMH vs MSCC)

| Variable                             | Category                       | SMH (N=534)            |                             |                        |                             | MSCC (N=705)           |                             |                         |                             |
|--------------------------------------|--------------------------------|------------------------|-----------------------------|------------------------|-----------------------------|------------------------|-----------------------------|-------------------------|-----------------------------|
|                                      |                                | <95% adherence         |                             | <80% adherence         |                             | <95% adherence         |                             | <80% adherence          |                             |
|                                      |                                | Unadjusted OR (95% CI) | <i>P</i> value <sup>a</sup> | Unadjusted OR (95% CI) | <i>P</i> value <sup>a</sup> | Unadjusted OR (95% CI) | <i>P</i> value <sup>a</sup> | Unadjusted OR (95% CI)  | <i>P</i> value <sup>a</sup> |
| HATQoL burden item <sup>b</sup>      | Dissatisfied (vs satisfied)    | 3.617<br>(2.239-5.842) | <b>&lt;0.0001</b>           | 4.523<br>(2.179-9.389) | <b>&lt;0.0001</b>           | 5.382<br>(3.470-8.348) | <b>&lt;0.0001</b>           | 6.450<br>(3.823-10.881) | <b>&lt;0.0001</b>           |
| HATQoL normal life item <sup>c</sup> | Dissatisfied (vs satisfied)    | 2.941<br>(1.757-4.925) | <b>&lt;0.0001</b>           | 4.276<br>(2.019-9.057) | <b>0.0001</b>               | 2.462<br>(1.553-3.905) | <b>0.0001</b>               | 3.570<br>(2.055-6.201)  | <b>&lt;0.0001</b>           |
| Combined HATQoL items                | Dissatisfied (vs satisfied)    | 3.170<br>(2.009-5.002) | <b>&lt;0.0001</b>           | 3.972<br>(1.922-8.206) | <b>0.0002</b>               | 3.724<br>(2.496-5.556) | <b>&lt;0.0001</b>           | 4.842<br>(2.919-8.032)  | <b>&lt;0.0001</b>           |
| Difficulty meeting housing costs     | No (vs yes)                    | 0.418<br>(0.248-0.704) | <b>0.0010</b>               | 0.401<br>(0.161-0.996) | <b>0.0490</b>               | 0.884<br>(0.605-1.292) | 0.5240                      | 0.902<br>(0.531-1.531)  | 0.7028                      |
| Depression                           | Mild/None (vs moderate/severe) | 0.408<br>(0.244-0.681) | <b>0.0006</b>               | 0.604<br>(0.261-1.397) | 0.2388                      | 0.672<br>(0.439-1.028) | 0.0668                      | 0.672<br>(0.378-1.196)  | 0.1765                      |

|                               |                         |                        |               |                        |               |                        |        |                        |               |
|-------------------------------|-------------------------|------------------------|---------------|------------------------|---------------|------------------------|--------|------------------------|---------------|
| Intimate partner violence     | No (vs yes)             | 0.486<br>(0.247-0.955) | <b>0.0363</b> | 0.350<br>(0.135-0.911) | <b>0.0315</b> | 0.812<br>(0.426-1.546) | 0.5254 | 0.865<br>(0.353-2.120) | 0.7509        |
| Risk of malnutrition          | No (vs yes)             | 0.466<br>(0.280-0.776) | <b>0.0034</b> | 0.424<br>(0.193-0.930) | <b>0.0322</b> | 0.680<br>(0.456-1.013) | 0.0579 | 0.763<br>(0.441-1.320) | 0.3337        |
| Current smoker                | No (vs yes)             | 0.845<br>(0.502-1.423) | 0.5261        | 1.858<br>(0.639-5.405) | 0.2555        | 0.638<br>(0.399-1.022) | 0.0618 | 0.356<br>(0.171-0.740) | <b>0.0057</b> |
| Alcohol use                   | Low risk (vs high risk) | 1.135<br>(0.662-1.947) | 0.6456        | 0.966<br>(0.408-2.287) | 0.9369        | 1.338<br>(0.831-2.155) | 0.2304 | 1.501<br>(0.748-3.010) | 0.2531        |
| Substance use (past 3 months) | No (vs yes)             | 1.082<br>(0.542-2.163) | 0.8227        | 0.934<br>(0.250-3.487) | 0.9189        | 1.024<br>(0.664-1.580) | 0.9128 | 0.919<br>(0.477-1.769) | 0.8007        |

**Notes:** <sup>a</sup>Bold values denote *P* values <0.05. <sup>b</sup>In the past 4 weeks, taking my [HIV] medicine has been a burden. <sup>c</sup>In the past 4 weeks, taking my [HIV] medicine has made it hard to live a normal life.

**Abbreviations:** ART, antiretroviral therapy; CI, confidence interval; HATQoL, HIV/AIDS-targeted quality of life; MSCC, Midway Specialty Care Center; OR, odds ratio; PWH, people with HIV; SMH, St Michael's Hospital.

**Supplementary Table 3** Adjusted odds ratios from multivariate logistic regression models for association with <95% adherence to ART among PWH by study site (SMH vs MSCC)

| Variable                         | Category                       | SMH                                     |                             |                                        |                             | MSCC                                    |                             |                                        |                             |
|----------------------------------|--------------------------------|-----------------------------------------|-----------------------------|----------------------------------------|-----------------------------|-----------------------------------------|-----------------------------|----------------------------------------|-----------------------------|
|                                  |                                | Before multiple imputation <sup>a</sup> |                             | After multiple imputation <sup>b</sup> |                             | Before multiple imputation <sup>c</sup> |                             | After multiple imputation <sup>d</sup> |                             |
|                                  |                                | Adjusted OR (95% CI)                    | <i>P</i> value <sup>e</sup> | Adjusted OR (95% CI)                   | <i>P</i> value <sup>e</sup> | Adjusted OR (95% CI)                    | <i>P</i> value <sup>e</sup> | Adjusted OR (95% CI)                   | <i>P</i> value <sup>e</sup> |
| Model 1: HATQoL burden item      |                                |                                         |                             |                                        |                             |                                         |                             |                                        |                             |
| HATQoL burden item <sup>f</sup>  | Dissatisfied (vs satisfied)    | 2.546<br>(1.406-4.610)                  | <b>0.0020</b>               | 2.685<br>(1.602-4.501)                 | <b>0.0002</b>               | 4.986<br>(3.127-7.950)                  | <b>&lt;0.0001</b>           | 5.150<br>(3.299-8.040)                 | <b>&lt;0.0001</b>           |
| Difficulty meeting housing costs | No (vs yes)                    | 0.577<br>(0.314-1.060)                  | 0.0765                      | 0.550<br>(0.320-0.947)                 | <b>0.0312</b>               | —                                       | —                           | —                                      | —                           |
| Depression                       | Mild/None (vs moderate/severe) | 0.787<br>(0.417-1.487)                  | 0.4610                      | 0.703<br>(0.392-1.260)                 | 0.2365                      | 0.900<br>(0.563-1.438)                  | 0.6595                      | 0.870<br>(0.546-1.385)                 | 0.5572                      |
| Intimate partner violence        | No (vs yes)                    | 0.570<br>(0.265-1.226)                  | 0.1503                      | 0.620<br>(0.303-1.271)                 | 0.1917                      | —                                       | —                           | —                                      | —                           |

|                                      |                                |                        |               |                        |               |                        |                   |                        |                   |
|--------------------------------------|--------------------------------|------------------------|---------------|------------------------|---------------|------------------------|-------------------|------------------------|-------------------|
| Risk of malnutrition                 | No (vs yes)                    | 0.594<br>(0.320-1.104) | 0.0995        | 0.612<br>(0.354-1.060) | 0.0795        | 0.816<br>(0.516-1.292) | 0.3860            | 0.827<br>(0.535-1.280) | 0.3950            |
| Model 2: HATQoL normal life item     |                                |                        |               |                        |               |                        |                   |                        |                   |
| HATQoL normal life item <sup>9</sup> | Dissatisfied (vs satisfied)    | 1.795<br>(0.926-3.477) | 0.0830        | 2.000<br>(1.145-3.496) | <b>0.0149</b> | 2.314<br>(1.411-3.793) | <b>0.0009</b>     | 2.399<br>(1.497-3.846) | <b>0.0003</b>     |
| Difficulty meeting housing costs     | No (vs yes)                    | 0.592<br>(0.327-1.071) | 0.0832        | 0.534<br>(0.311-0.915) | <b>0.0225</b> | —                      | —                 | —                      | —                 |
| Depression                           | Mild/None (vs moderate/severe) | 0.598<br>(0.326-1.098) | 0.0970        | 0.626<br>(0.354-1.109) | 0.1081        | 0.830<br>(0.525-1.310) | 0.4234            | 0.840<br>(0.535-1.321) | 0.4514            |
| Intimate partner violence            | No (vs yes)                    | 0.675<br>(0.318-1.432) | 0.3062        | 0.691<br>(0.342-1.396) | 0.3028        | —                      | —                 | —                      | —                 |
| Risk of malnutrition                 | No (vs yes)                    | 0.633<br>(0.344-1.167) | 0.1432        | 0.603<br>(0.350-1.039) | 0.0684        | 0.787<br>(0.505-1.224) | 0.2875            | 0.783<br>(0.515-1.190) | 0.2513            |
| Model 3: Combined HATQoL items       |                                |                        |               |                        |               |                        |                   |                        |                   |
| Combined HATQoL items                | Dissatisfied (vs satisfied)    | 2.271<br>(1.293-3.990) | <b>0.0043</b> | 2.453<br>(1.500-4.010) | <b>0.0003</b> | 3.419<br>(2.229-5.245) | <b>&lt;0.0001</b> | 3.564<br>(2.362-5.377) | <b>&lt;0.0001</b> |

|                                  |                                |                        |        |                        |               |                        |        |                        |        |
|----------------------------------|--------------------------------|------------------------|--------|------------------------|---------------|------------------------|--------|------------------------|--------|
| Difficulty meeting housing costs | No (vs yes)                    | 0.607<br>(0.335-1.101) | 0.1001 | 0.555<br>(0.322-0.955) | <b>0.0336</b> | —                      | —      | —                      | —      |
| Depression                       | Mild/None (vs moderate/severe) | 0.650<br>(0.352-1.198) | 0.1670 | 0.678<br>(0.381-1.206) | 0.1857        | 0.902<br>(0.568-1.431) | 0.6602 | 0.919<br>(0.578-1.460) | 0.7208 |
| Intimate partner violence        | No (vs yes)                    | 0.665<br>(0.311-1.420) | 0.2915 | 0.674<br>(0.331-1.374) | 0.2778        | —                      | —      | —                      | —      |
| Risk of malnutrition             | No (vs yes)                    | 0.650<br>(0.352-1.202) | 0.1697 | 0.612<br>(0.355-1.057) | 0.0781        | 0.813<br>(0.518-1.275) | 0.3665 | 0.802<br>(0.523-1.230) | 0.3110 |

**Notes:** <sup>a</sup>N=441, N=444, and N=448 in models 1, 2, and 3, respectively. <sup>b</sup>N=534 in each model. <sup>c</sup>N=656, N=656, and N=662 in models 1, 2, and 3, respectively. <sup>d</sup>N=705 in each model. <sup>e</sup>Bold values denote *P* values <0.05. <sup>f</sup>In the past 4 weeks, taking my [HIV] medicine has been a burden. <sup>g</sup>In the past 4 weeks, taking my [HIV] medicine has made it hard to live a normal life.

**Abbreviations:** ART, antiretroviral therapy; CI, confidence interval; HATQoL, HIV/AIDS-targeted quality of life; MSCC, Midway Specialty Care Center; OR, odds ratio; PWH, people with HIV; SMH, St Michael's Hospital.



**Supplementary Table 4** Adjusted odds ratios from multivariate logistic regression models for association with <80% adherence to ART among PWH (SMH)<sup>a</sup>

| Variable                             | Category                    | Before multiple imputation <sup>b</sup> |                             | After multiple imputation <sup>c</sup> |                             |
|--------------------------------------|-----------------------------|-----------------------------------------|-----------------------------|----------------------------------------|-----------------------------|
|                                      |                             | Adjusted OR (95% CI)                    | <i>P</i> value <sup>d</sup> | Adjusted OR (95% CI)                   | <i>P</i> value <sup>d</sup> |
| Model 1: HATQoL burden item          |                             |                                         |                             |                                        |                             |
| HATQoL burden item <sup>e</sup>      | Dissatisfied (vs satisfied) | 2.401 (1.002-5.752)                     | <b>0.0494</b>               | 3.518 (1.645-7.524)                    | <b>0.0012</b>               |
| Difficulty meeting housing costs     | No (vs yes)                 | 0.570 (0.204-1.596)                     | 0.2847                      | 0.573 (0.223-1.473)                    | 0.2476                      |
| Intimate partner violence            | No (vs yes)                 | 0.468 (0.159-1.373)                     | 0.1667                      | 0.491 (0.180-1.343)                    | 0.1659                      |
| Risk of malnutrition                 | No (vs yes)                 | 0.517 (0.206-1.296)                     | 0.1595                      | 0.559 (0.246-1.273)                    | 0.1662                      |
| Model 2: HATQoL normal life item     |                             |                                         |                             |                                        |                             |
| HATQoL normal life item <sup>f</sup> | Dissatisfied (vs satisfied) | 2.297 (0.901-5.856)                     | 0.0814                      | 3.136 (1.409-6.976)                    | <b>0.0051</b>               |
| Difficulty meeting housing costs     | No (vs yes)                 | 0.557 (0.199-1.560)                     | 0.2651                      | 0.559 (0.217-1.440)                    | 0.2285                      |
| Intimate partner violence            | No (vs yes)                 | 0.524 (0.179-1.532)                     | 0.2380                      | 0.551 (0.204-1.491)                    | 0.2404                      |
| Risk of malnutrition                 | No (vs yes)                 | 0.525 (0.210-1.311)                     | 0.1673                      | 0.550 (0.244-1.242)                    | 0.1503                      |

| Model 3: Combined HATQoL items   |                             |                     |        |                     |               |
|----------------------------------|-----------------------------|---------------------|--------|---------------------|---------------|
| Combined HATQoL items            | Dissatisfied (vs satisfied) | 2.181 (0.924-5.147) | 0.0752 | 3.038 (1.418-6.509) | <b>0.0043</b> |
| Difficulty meeting housing costs | No (vs yes)                 | 0.552 (0.198-1.544) | 0.2577 | 0.567 (0.220-1.458) | 0.2387        |
| Intimate partner violence        | No (vs yes)                 | 0.506 (0.173-1.481) | 0.2139 | 0.529 (0.196-1.432) | 0.2102        |
| Risk of malnutrition             | No (vs yes)                 | 0.523 (0.209-1.307) | 0.1652 | 0.544 (0.242-1.224) | 0.1413        |

**Notes:** <sup>a</sup>Results from multivariate logistic regression were not available at the MSCC site because HATQoL factors were the only variables with unadjusted *P* values <0.15. <sup>b</sup>N=458, N=461, and N=467 in models 1, 2, and 3, respectively. <sup>c</sup>N=534 in each model. <sup>d</sup>Bold values denote *P* values <0.05. <sup>e</sup>In the past 4 weeks, taking my [HIV] medicine has been a burden. <sup>f</sup>In the past 4 weeks, taking my [HIV] medicine has made it hard to live a normal life.

**Abbreviations:** ART, antiretroviral therapy; CI, confidence interval; HATQoL, HIV/AIDS-targeted quality of life; MSCC, Midway Specialty Care Center; OR, odds ratio; PWH, people with HIV; SMH, St Michael's Hospital.

**Supplementary Table 5** Adjusted odds ratios from multivariate stepwise selection logistic regression models for association with <95% adherence to ART among PWH (SMH)<sup>a</sup>

| Variable                             | Category                    | Before multiple imputation <sup>b</sup> |                             | After multiple imputation <sup>c</sup> |                             |
|--------------------------------------|-----------------------------|-----------------------------------------|-----------------------------|----------------------------------------|-----------------------------|
|                                      |                             | Adjusted OR (95% CI)                    | <i>P</i> value <sup>d</sup> | Adjusted OR (95% CI)                   | <i>P</i> value <sup>d</sup> |
| Model 1: HATQoL burden item          |                             |                                         |                             |                                        |                             |
| HATQoL burden item <sup>e</sup>      | Dissatisfied (vs satisfied) | 3.468 (2.084-5.772)                     | <b>&lt;0.0001</b>           | 3.105 (1.912-5.043)                    | <b>&lt;0.0001</b>           |
| Difficulty meeting housing costs     | No (vs yes)                 | 0.513 (0.296-0.889)                     | <b>0.0174</b>               | 0.503 (0.296-0.856)                    | <b>0.0112</b>               |
| Model 2: HATQoL normal life item     |                             |                                         |                             |                                        |                             |
| HATQoL normal life item <sup>f</sup> | Dissatisfied (vs satisfied) | 2.272 (1.288-4.007)                     | <b>0.0046</b>               | 2.279 (1.332-3.897)                    | <b>0.0026</b>               |
| Difficulty meeting housing costs     | No (vs yes)                 | 0.505 (0.295-0.864)                     | <b>0.0128</b>               | 0.491 (0.289-0.836)                    | <b>0.0087</b>               |
| Risk of malnutrition                 | No (vs yes)                 | 0.541 (0.310-0.943)                     | <b>0.0301</b>               | 0.544 (0.321-0.924)                    | <b>0.0242</b>               |
| Model 3: Combined HATQoL items       |                             |                                         |                             |                                        |                             |
| Combined HATQoL items                | Dissatisfied (vs satisfied) | 3.051 (1.882-4.947)                     | <b>&lt;0.0001</b>           | 2.882 (1.809-4.591)                    | <b>&lt;0.0001</b>           |

|                                  |             |                     |               |                     |               |
|----------------------------------|-------------|---------------------|---------------|---------------------|---------------|
| Difficulty meeting housing costs | No (vs yes) | 0.516 (0.301-0.884) | <b>0.0160</b> | 0.508 (0.299-0.864) | <b>0.0124</b> |
|----------------------------------|-------------|---------------------|---------------|---------------------|---------------|

**Notes:** <sup>a</sup>Results from multivariate stepwise selection logistic regression were not available at the MSCC site because HATQoL factors were the only variables remaining after stepwise selection. <sup>b</sup>N=495, N=495, and N=508 in models 1, 2, and 3, respectively. <sup>c</sup>N=534 in each model. <sup>d</sup>Bold values denote *P* values <0.05. <sup>e</sup>In the past 4 weeks, taking my [HIV] medicine has been a burden. <sup>f</sup>In the past 4 weeks, taking my [HIV] medicine has made it hard to live a normal life.

**Abbreviations:** ART, antiretroviral therapy; CI, confidence interval; HATQoL, HIV/AIDS-targeted quality of life; MSCC, Midway Specialty Care Center; OR, odds ratio; PWH, people with HIV; SMH, St Michael's Hospital.
